# Supplementary material for: Isolation and Characterization of Two New Metabolites from the Sponge-Derived Fungus Aspergillus sp. LS34 by OSMAC Approach
Source: MDPI journal article supplement (doi:10.3390/md17050283), 2019-05-11
Supplement: s1 [file s1]

## *Supplementary Material*

# **Isolation and Characterization of Two New Metabolites from the Sponge-Derived Fungus *Aspergillus* sp. LS34 by OSMAC Approach**

**Wei Li, Lijian Ding\*, Ning Wang, Jianzhou Xu, Weiyan Zhang, Bin Zhang, Shan He, Haixiao Jin\***

Li Dak Sum Yip Yio Chin Kenneth Li Marine Biopharmaceutical Research Center, College of Food and Pharmaceutical Sciences, Ningbo University 315800, Ningbo, P. R. China; 15058882124@163.com (W.L.); wangning2@nbu.edu.cn (N.W.); 15669221063@163.com (J.X.); zhangbin1@nbu.edu.cn (B.Z.); zhangweiyan@nbu.edu.cn (W.Z.); heshan@nbu.edu.cn (S.H.)

\* Correspondence: dinglijian@nbu.edu.cn (L.D.); jinhaixiao@nbu.edu.cn (H.J.); Tel.: +86-574-8760-4388 (L.D.); +86-574-8760-4388 (H.J.)

# The List of Contents

| No. | Content                                                                                      | Page |
|-----|----------------------------------------------------------------------------------------------|------|
| 1   | Figure S1. IR spectrum of <b>1</b>                                                           | 3    |
| 2   | Figure S2. UV spectrum of compound <b>1</b>                                                  | 3    |
| 3   | Figure S3. <sup>1</sup> H NMR spectrum of compound <b>1</b> in CDCl <sub>3</sub>             | 4    |
| 4   | Figure S4. <sup>13</sup> C NMR spectrum of compound <b>1</b> in CDCl <sub>3</sub>            | 4    |
| 5   | Figure S5. DEPT 135 spectrum of compound <b>1</b> in CDCl <sub>3</sub>                       | 5    |
| 6   | Figure S6. HSQC spectrum of compound <b>1</b> in CDCl <sub>3</sub>                           | 5    |
| 7   | Figure S7. HMBC spectrum of compound <b>1</b> in CDCl <sub>3</sub>                           | 6    |
| 8   | Figure S8. COSY spectrum of compound <b>1</b> in CDCl <sub>3</sub>                           | 6    |
| 9   | Figure S9. HRESIMS of compound <b>1</b>                                                      | 7    |
| 10  | Figure S10. IR spectrum of compound <b>2</b>                                                 | 7    |
| 11  | Figure S11. UV spectrum of compound <b>2</b>                                                 | 7    |
| 12  | Figure S12. <sup>1</sup> H NMR spectrum of compound <b>2</b> in CD <sub>3</sub> OD           | 8    |
| 13  | Figure S13. <sup>13</sup> C NMR spectrum of compound <b>2</b> in CD <sub>3</sub> OD          | 8    |
| 14  | Figure S14. DEPT 135 spectrum of compound <b>2</b> in CD <sub>3</sub> OD                     | 9    |
| 15  | Figure S15. HSQC spectrum of compound <b>2</b> in CD <sub>3</sub> OD                         | 9    |
| 16  | Figure S16. HMBC spectrum of compound <b>2</b> in CD <sub>3</sub> OD                         | 10   |
| 17  | Figure S17. COSY spectrum of compound <b>2</b> in CD <sub>3</sub> OD                         | 10   |
| 18  | Figure S18. HRESIMS of compound <b>2</b>                                                     | 11   |
| 19  | Figure S19. <sup>1</sup> H NMR spectrum of compound <b>3</b> in CD <sub>3</sub> OD           | 11   |
| 20  | Figure S20. <sup>13</sup> C NMR spectrum of compound <b>3</b> in CD <sub>3</sub> OD          | 12   |
| 21  | Figure S21. <sup>1</sup> H NMR spectrum of compound <b>4</b> in DMSO- <i>d</i> <sub>6</sub>  | 12   |
| 22  | Figure S22. <sup>13</sup> C NMR spectrum of compound <b>4</b> in DMSO- <i>d</i> <sub>6</sub> | 13   |
| 23  | Figure S23. <sup>1</sup> H NMR spectrum of compound <b>5</b> in CD <sub>3</sub> OD           | 13   |
| 24  | Figure S24. <sup>13</sup> C NMR spectrum of compound <b>5</b> in CD <sub>3</sub> OD          | 14   |
| 25  | Figure S25. <sup>1</sup> H NMR spectrum of compound <b>6</b> in CD <sub>3</sub> OD           | 14   |
| 26  | Figure S26. <sup>13</sup> C NMR spectrum of compound <b>6</b> in CD <sub>3</sub> OD          | 15   |
| 27  | Figure S27. <sup>1</sup> H NMR spectrum of compound <b>7</b> in CD <sub>3</sub> OD           | 15   |
| 28  | Figure S28. <sup>13</sup> C NMR spectrum of compound <b>7</b> in CD <sub>3</sub> OD          | 16   |
| 29  | Figure S29. <sup>1</sup> H NMR spectrum of compound <b>8</b> in CDCl <sub>3</sub>            | 16   |
| 30  | Figure S30. <sup>13</sup> C NMR spectrum of compound <b>8</b> in CDCl <sub>3</sub>           | 17   |
| 31  | Figure S31. <sup>1</sup> H NMR spectrum of compound <b>9</b> in CDCl <sub>3</sub>            | 17   |
| 32  | Figure S32. <sup>13</sup> C NMR spectrum of compound <b>9</b> in CDCl <sub>3</sub>           | 18   |
| 33  | Figure S33. HPLC analysis chromatogram of compound <b>1</b>                                  | 18   |
| 34  | Figure S34. HPLC analysis chromatogram of compound <b>2</b>                                  | 18   |

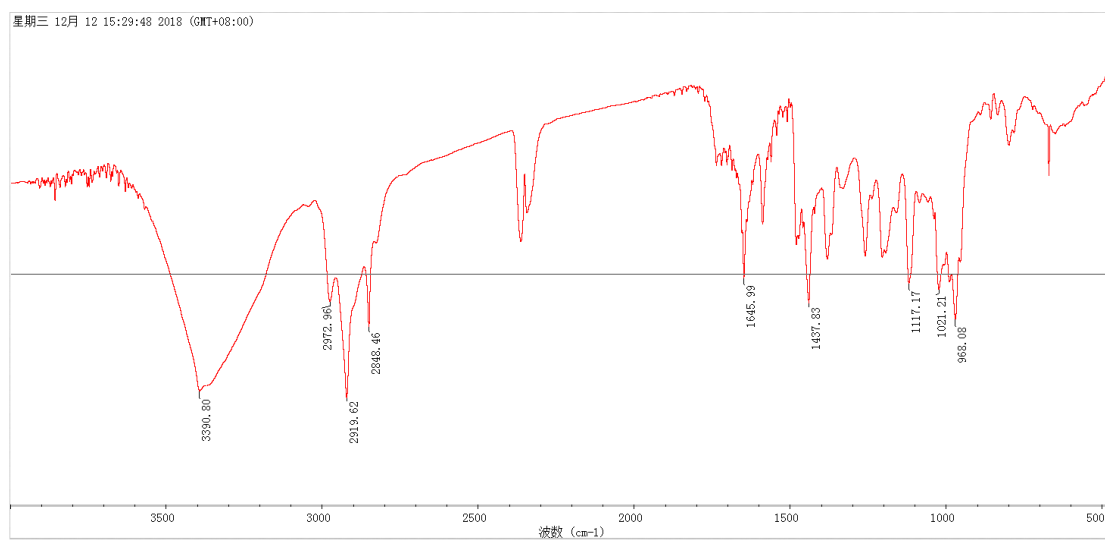

Figure S1. IR spectrum of compound 1

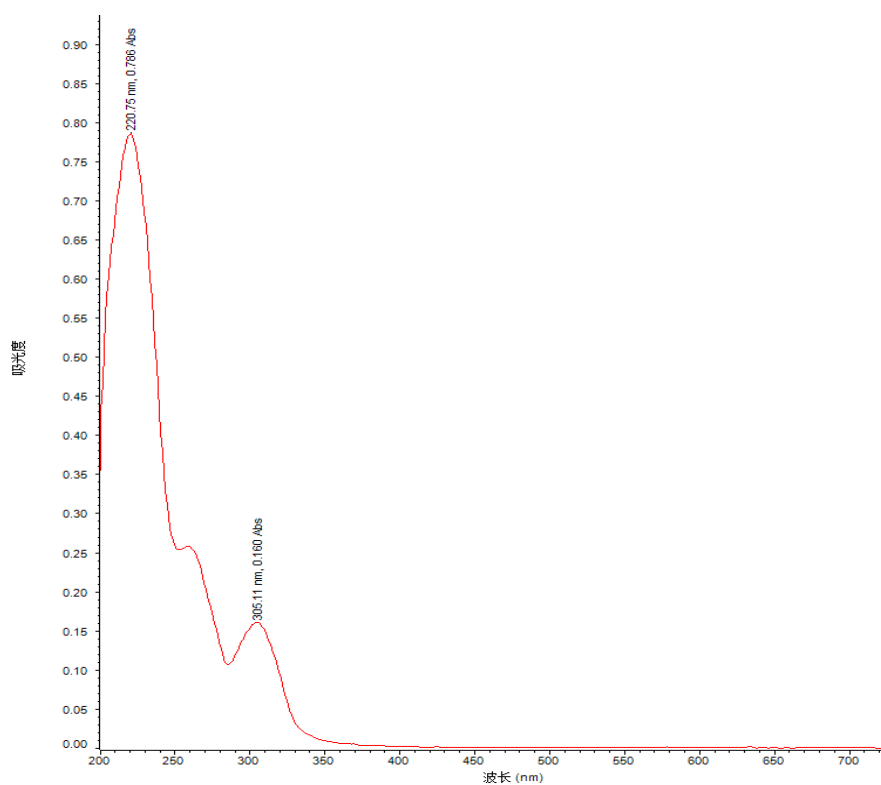

Figure S2. UV spectrum of compound 1

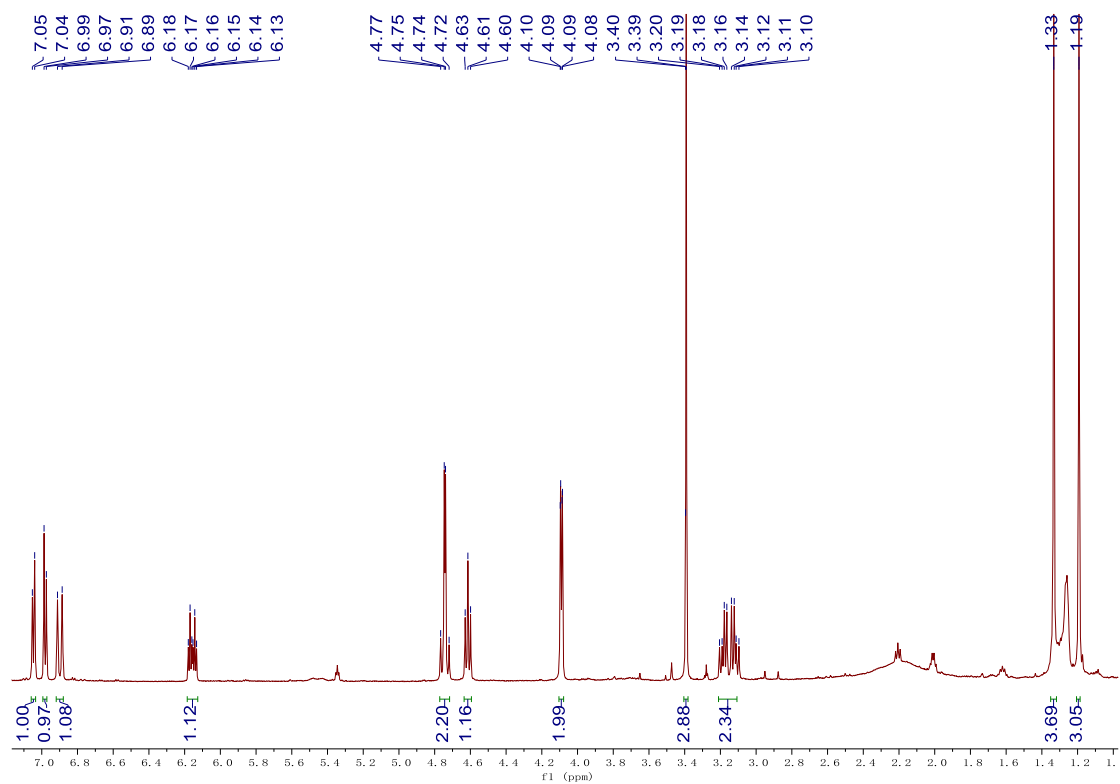

Figure S3. <sup>1</sup>H NMR spectrum of compound **1** in CDCl<sub>3</sub> (600 MHz)

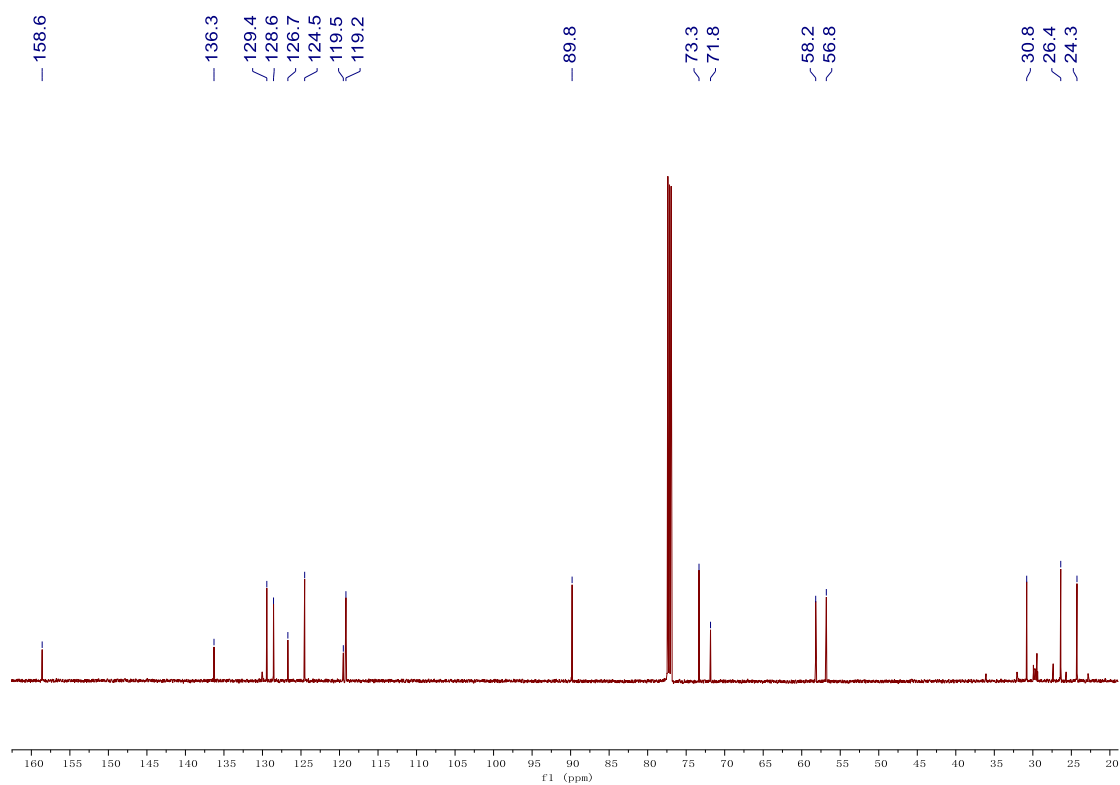

Figure S4. <sup>13</sup>C NMR spectrum of compound **1** in CDCl<sub>3</sub> (150 MHz)

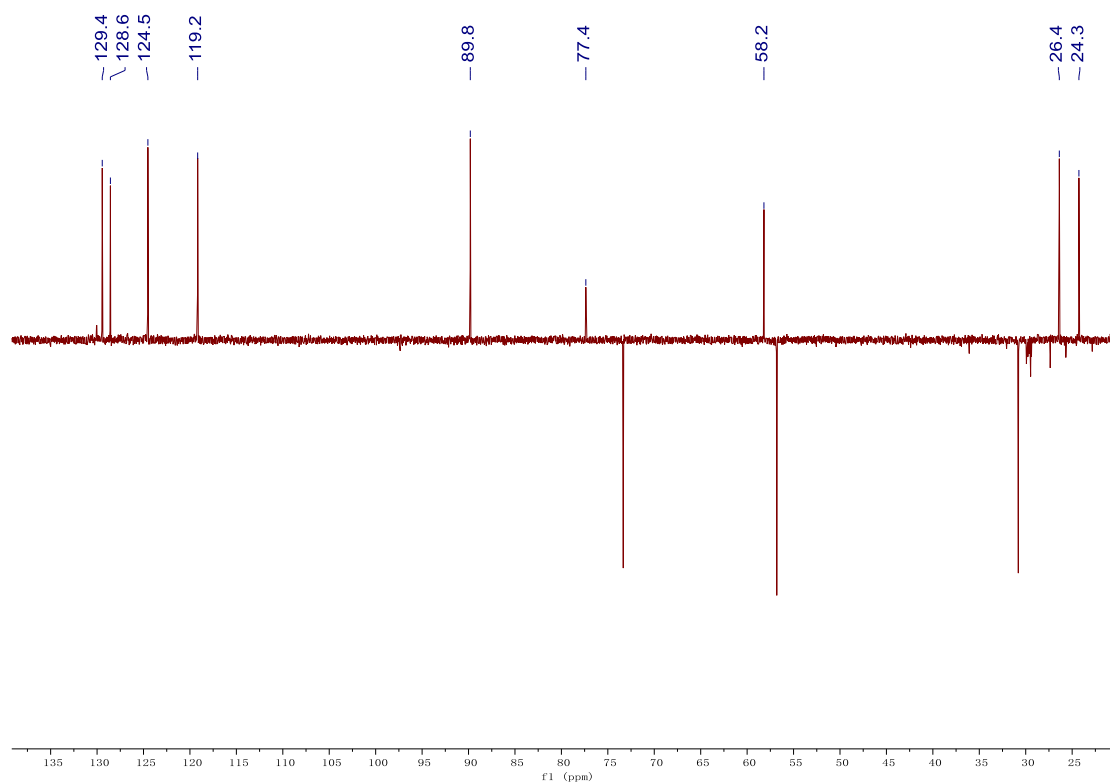

Figure S5. DEPT spectrum of compound 1 in CDCl<sub>3</sub>

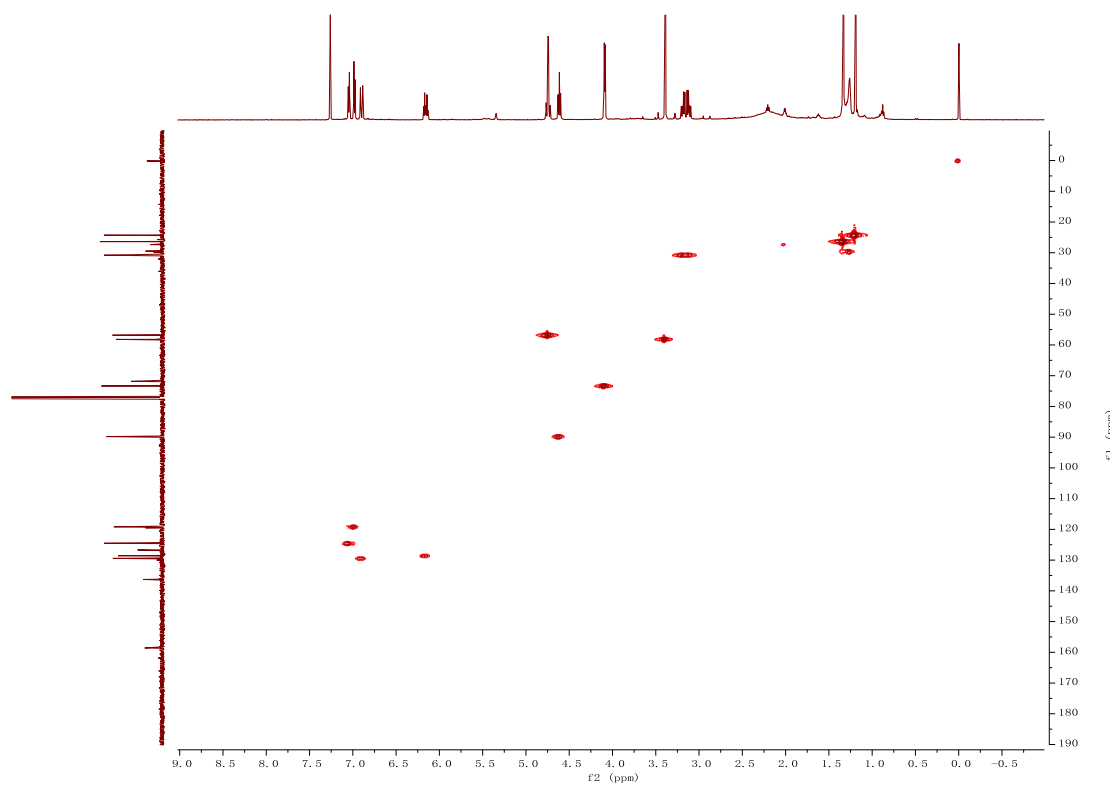

Figure S6. HSQC spectrum of compound 1 in CDCl<sub>3</sub>

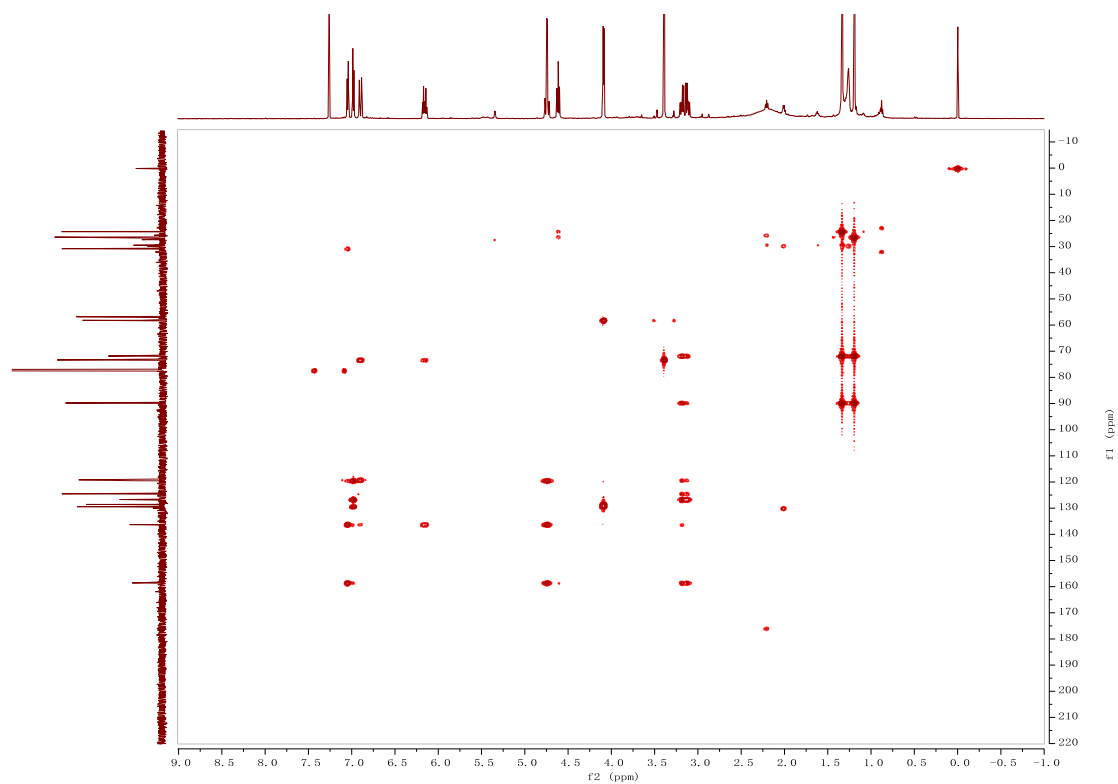

Figure S7. HMBC spectrum of compound **1** in CDCl<sub>3</sub>

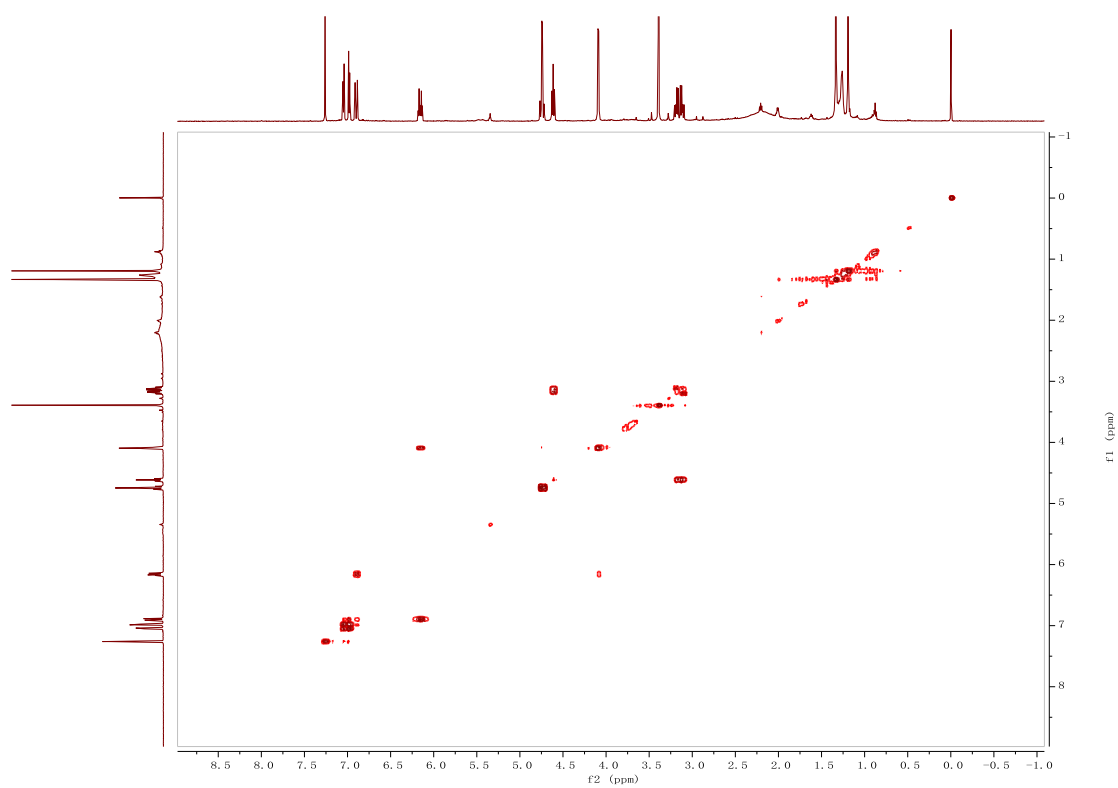

Figure S8. COSY spectrum of compound **1** in CDCl<sub>3</sub>

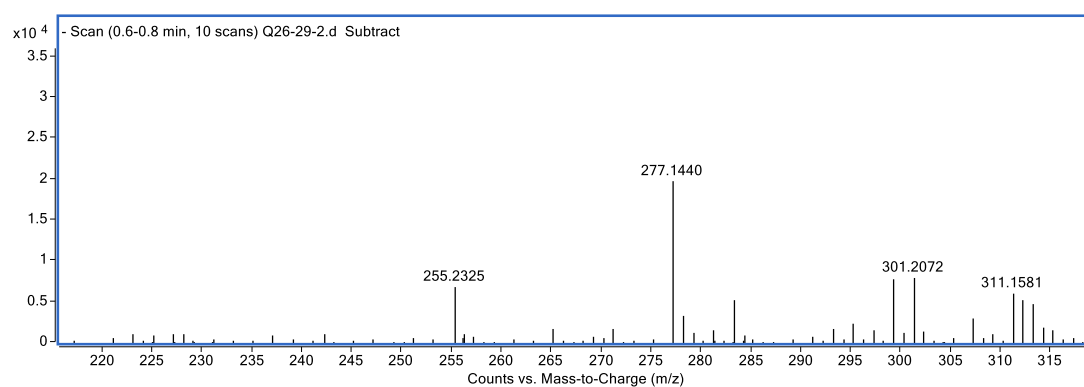

| Formula (M)                                    | Ion Formula                                    | m/z     | Calc m/z | Diff (ppm) | DBE |
|------------------------------------------------|------------------------------------------------|---------|----------|------------|-----|
| C <sub>16</sub> H <sub>22</sub> O <sub>4</sub> | C <sub>16</sub> H <sub>21</sub> O <sub>4</sub> | 277.144 | 277.1445 | 1.92       | 6   |

Figure S9. HRESIMS of compound 1

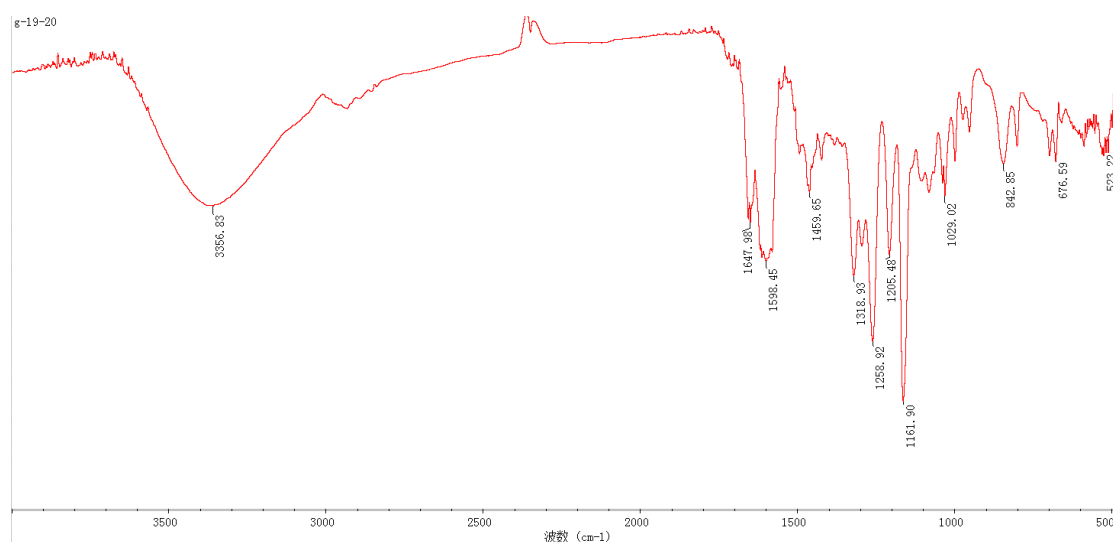

Figure S10. IR spectrum of compound 2

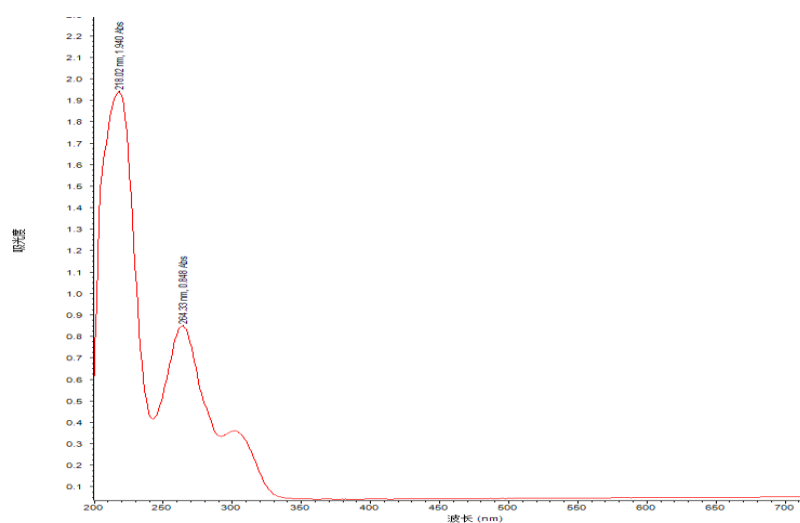

Figure S11. UV spectrum of compound 2

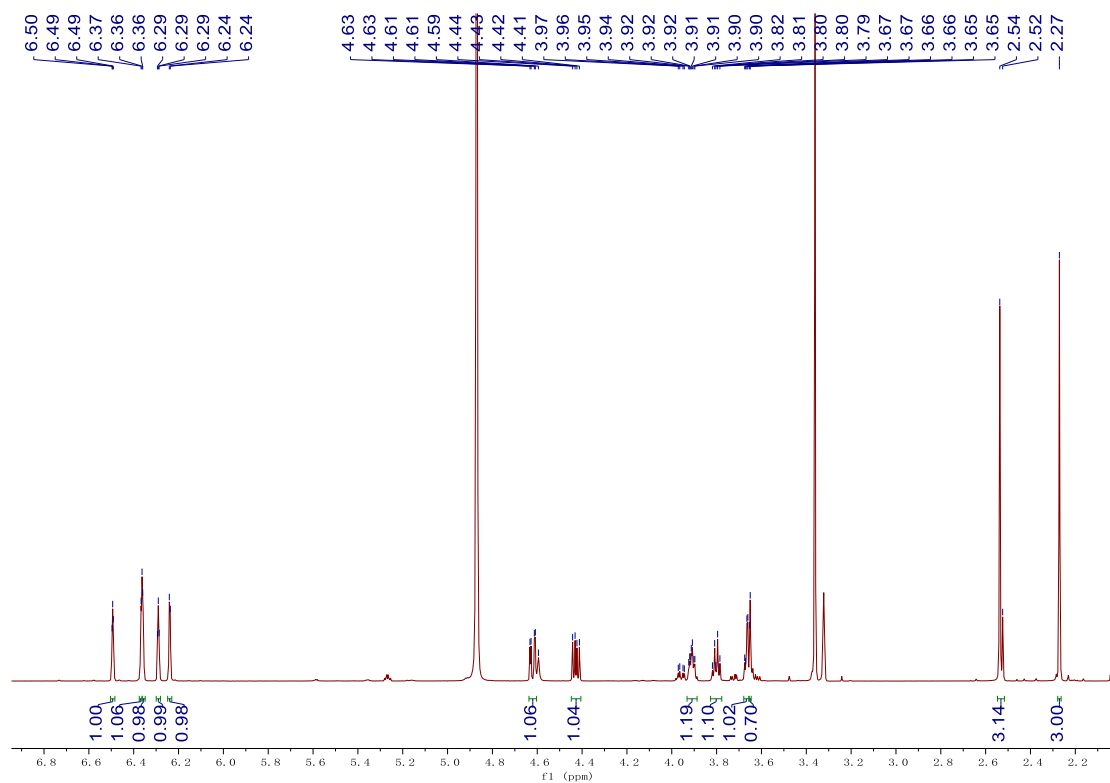

Figure S12. <sup>1</sup>H NMR spectrum of compound **2** in CD<sub>3</sub>OD (600 MHz)

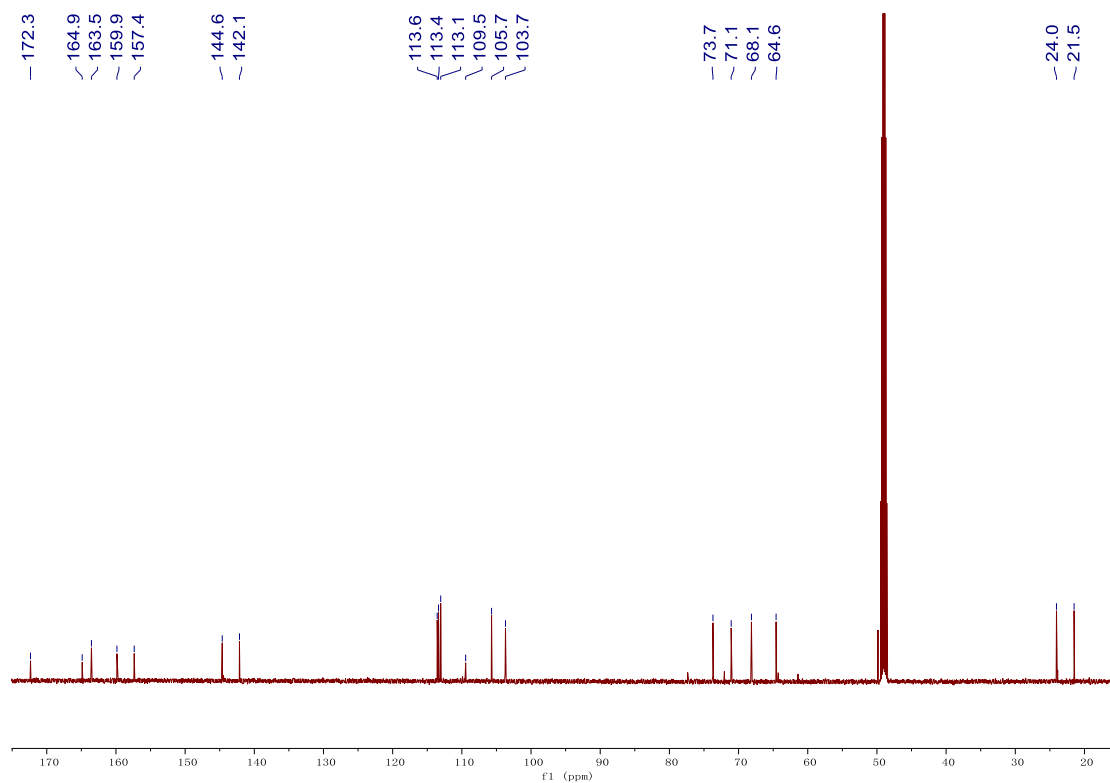

Figure S13. <sup>13</sup>C NMR spectrum of compound **2** in CD<sub>3</sub>OD (150 MHz)



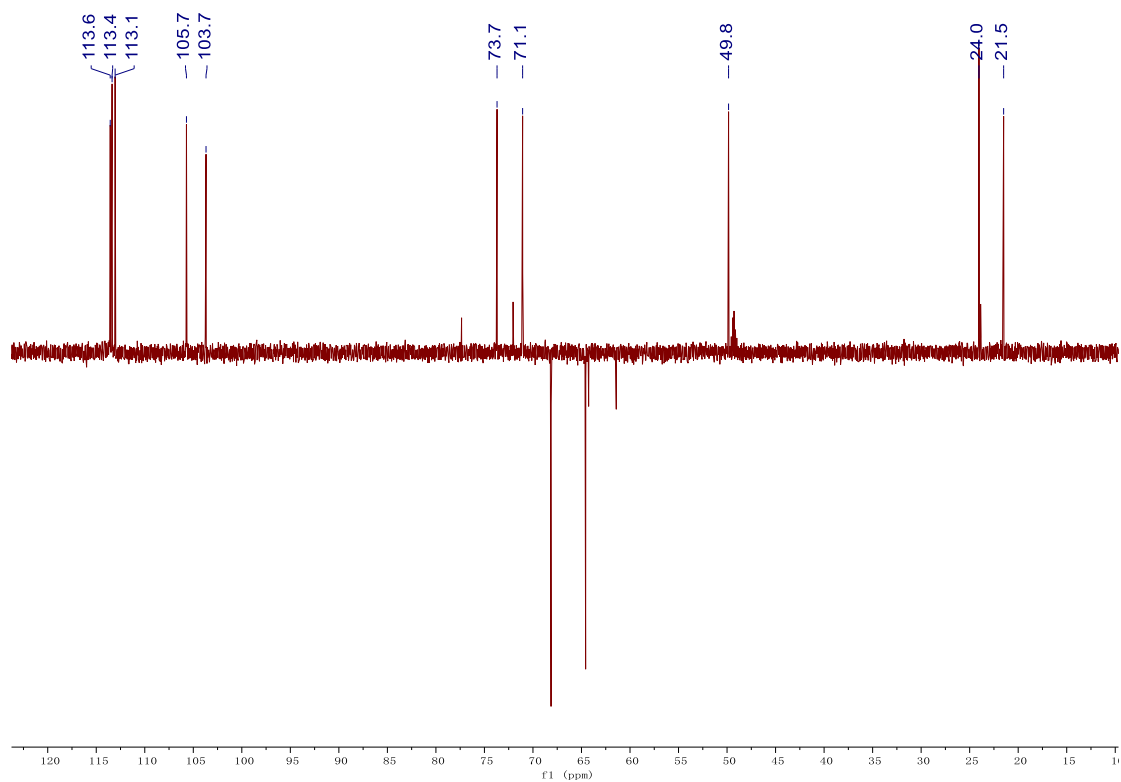

Figure S14. DEPT 135 spectrum of compound **2** in CD<sub>3</sub>OD

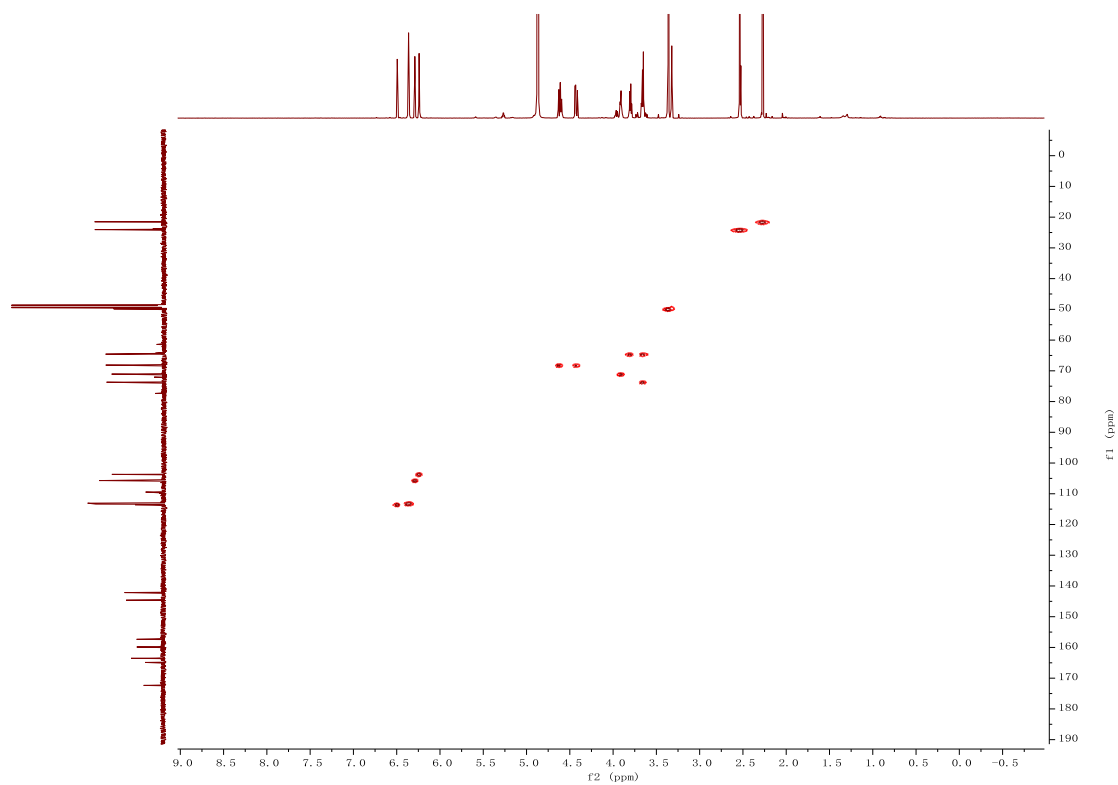

Figure S15. HSQC spectrum of compound **2** in CD<sub>3</sub>OD

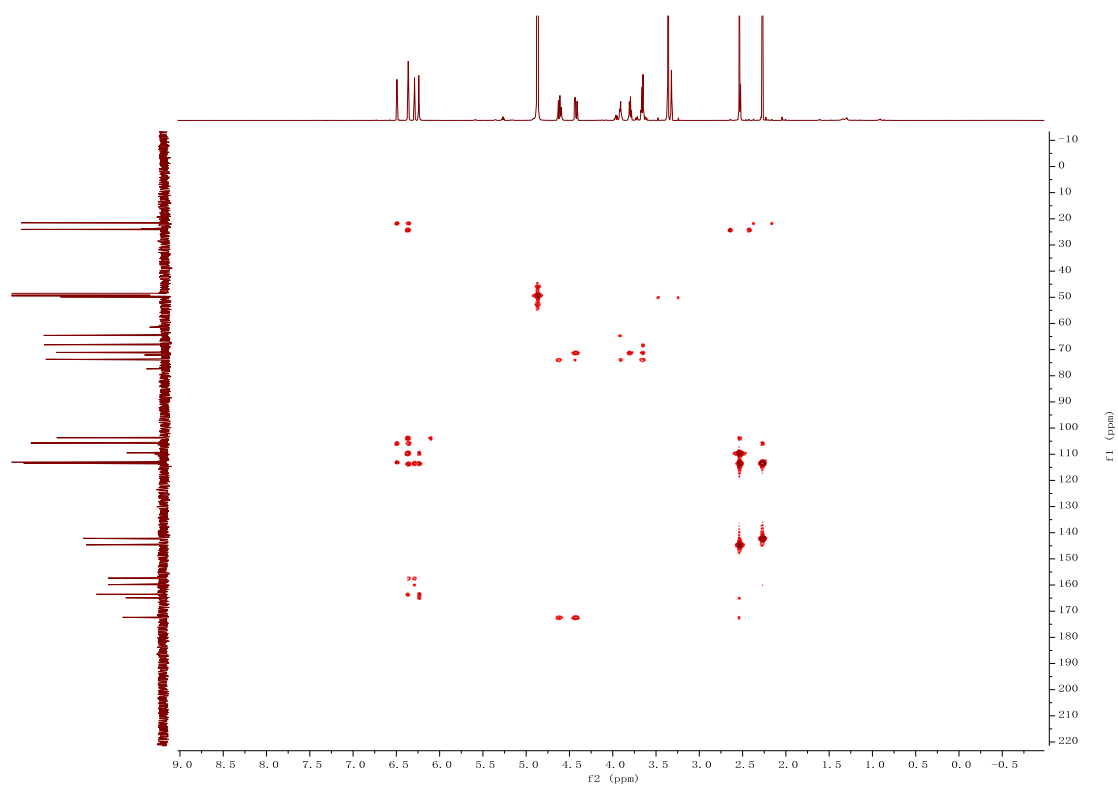

Figure S16. HMBC spectrum of compound **2** in CD<sub>3</sub>OD

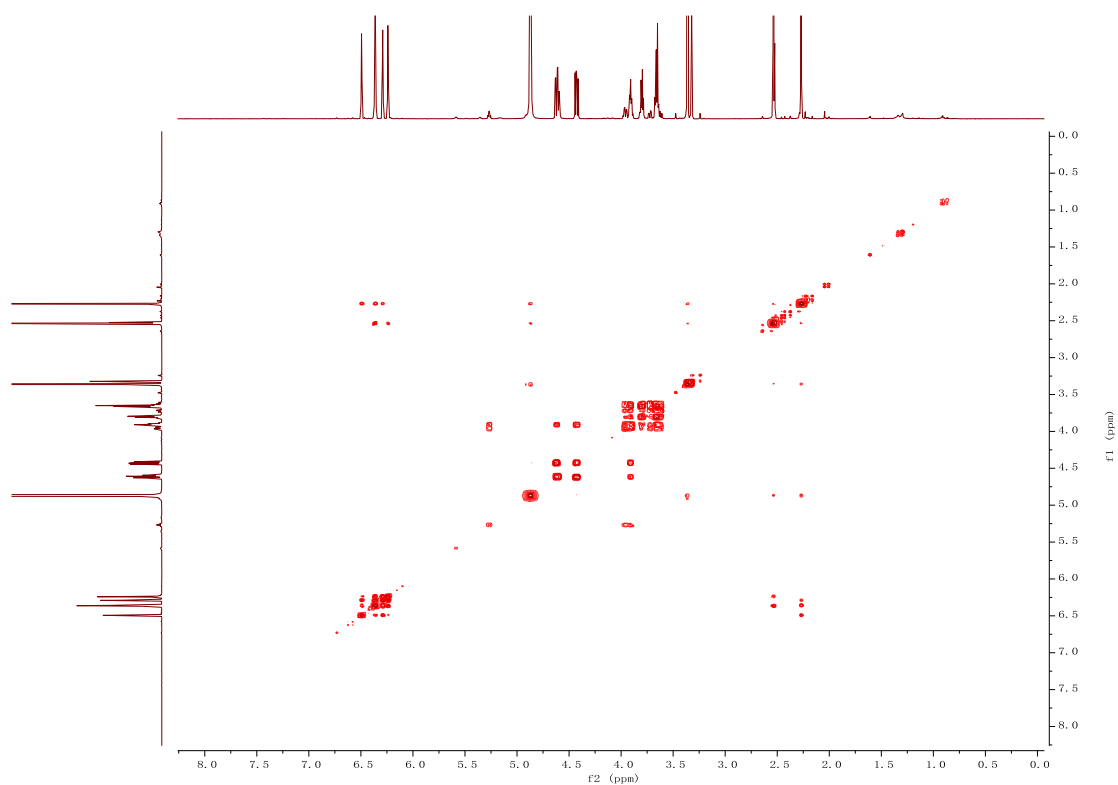

Figure S17. COSY spectrum of compound **2** in CD<sub>3</sub>OD

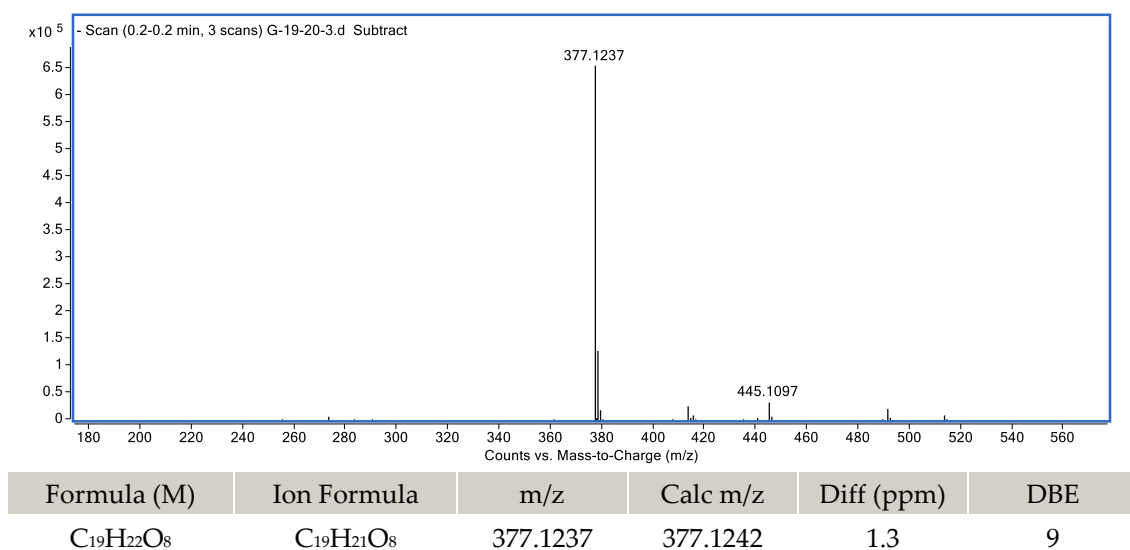

Figure S18. HRESIMS of compound **2**

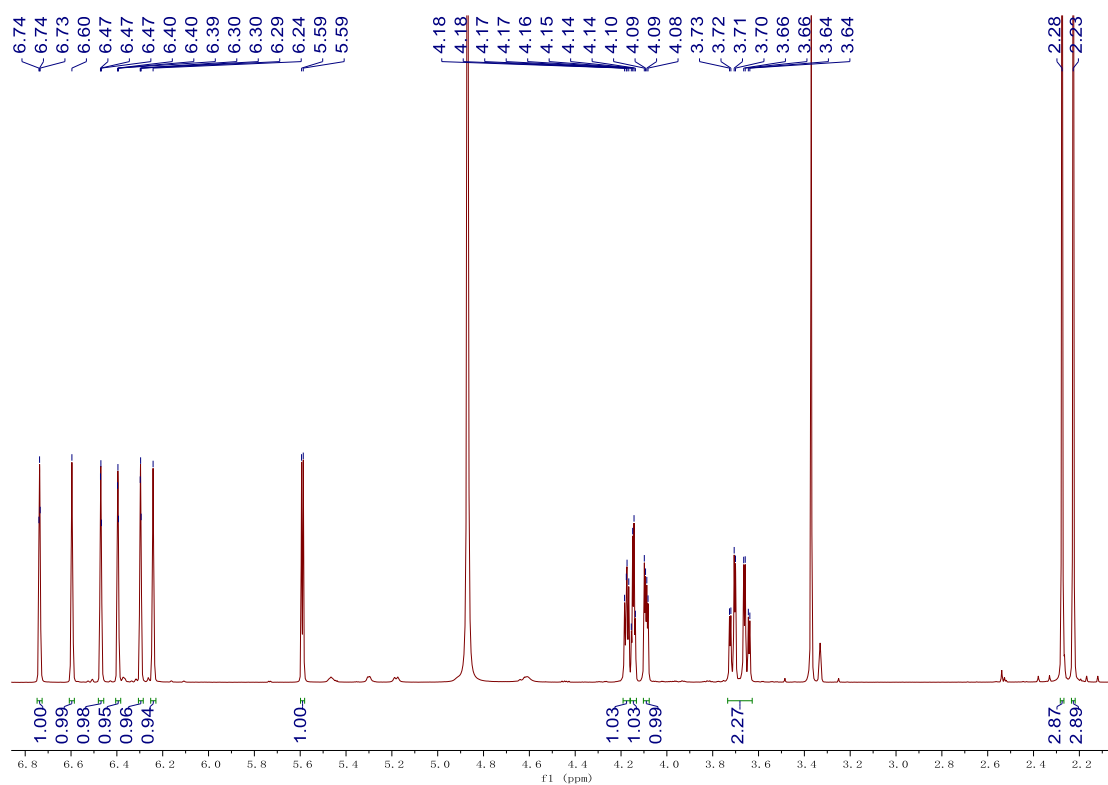

Figure S19. <sup>1</sup>H NMR spectrum of compound **3** in CD<sub>3</sub>OD (600 MHz)

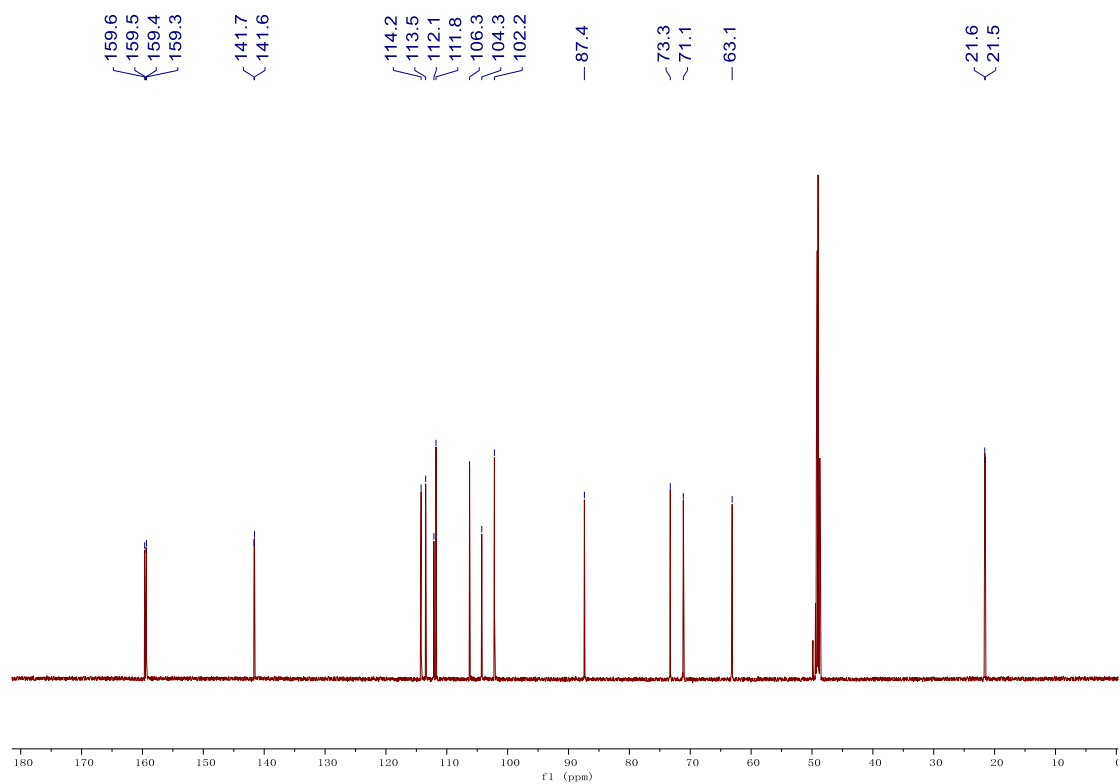

Figure S20. <sup>13</sup>C NMR spectrum of compound **3** in CD<sub>3</sub>OD (600 MHz)

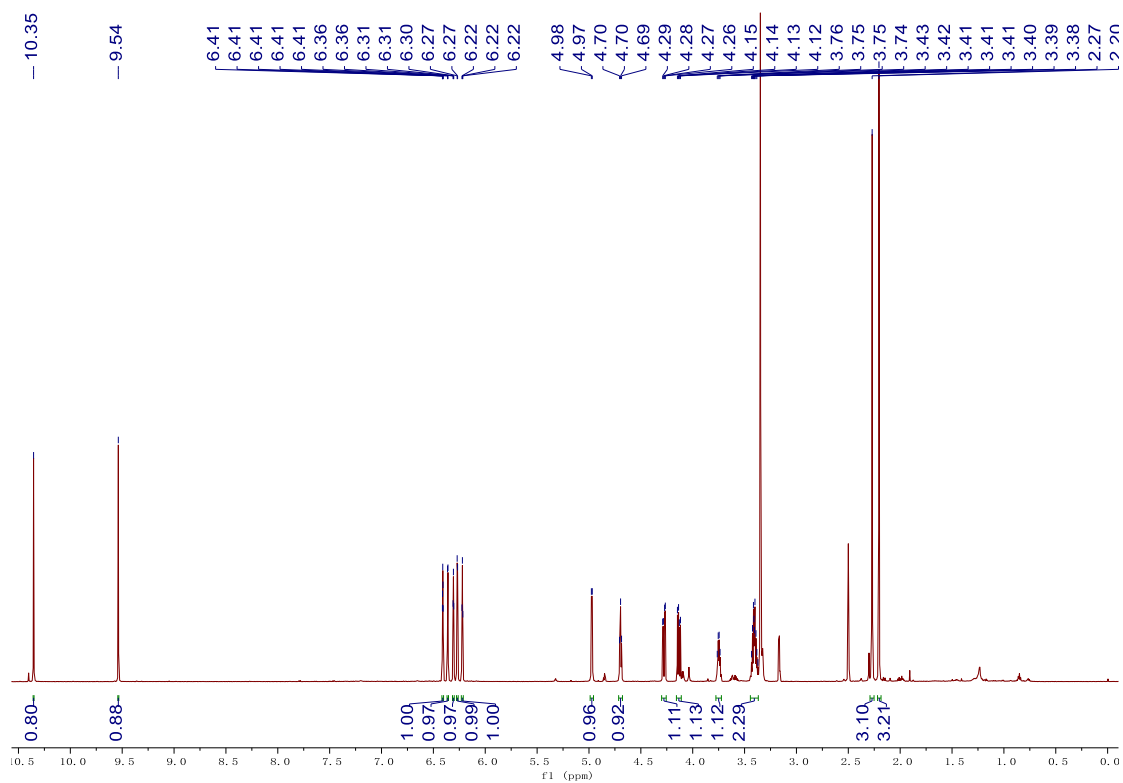

Figure S21. <sup>1</sup>H NMR spectrum of compound **4** in DMSO-*d*<sub>6</sub> (600 MHz)

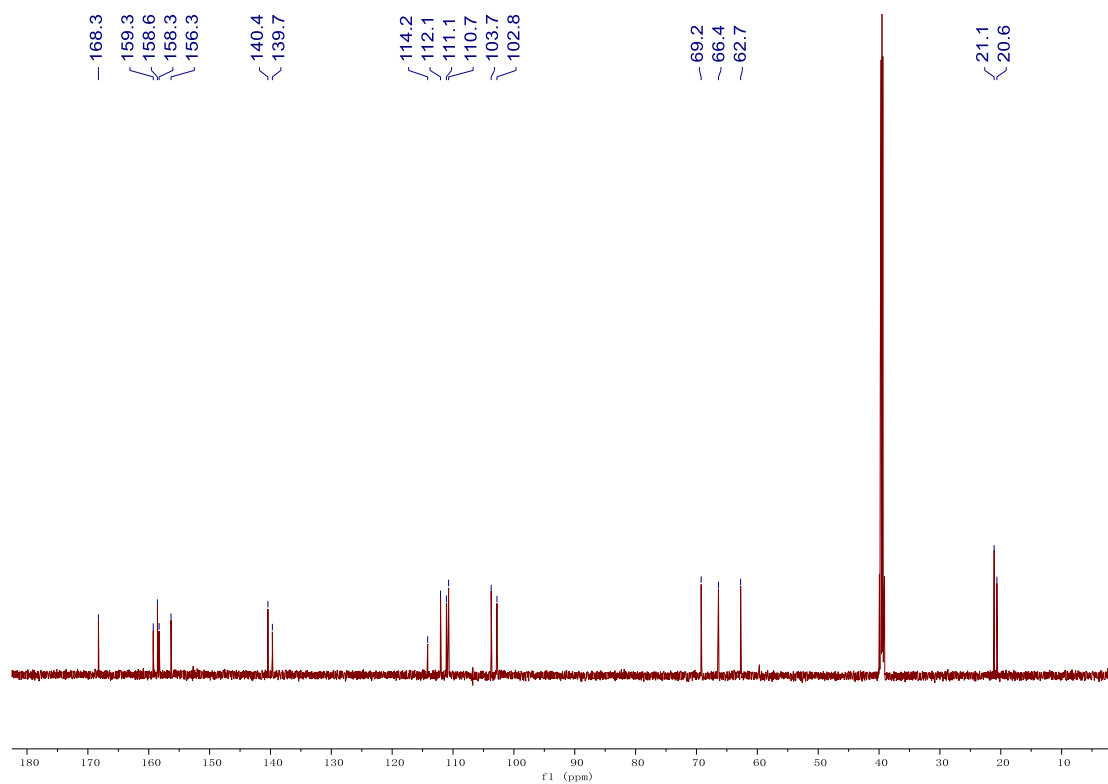

Figure S22.  $^{13}\text{C}$  NMR spectrum of compound **4** in  $\text{DMSO-}d_6$  (600 MHz)

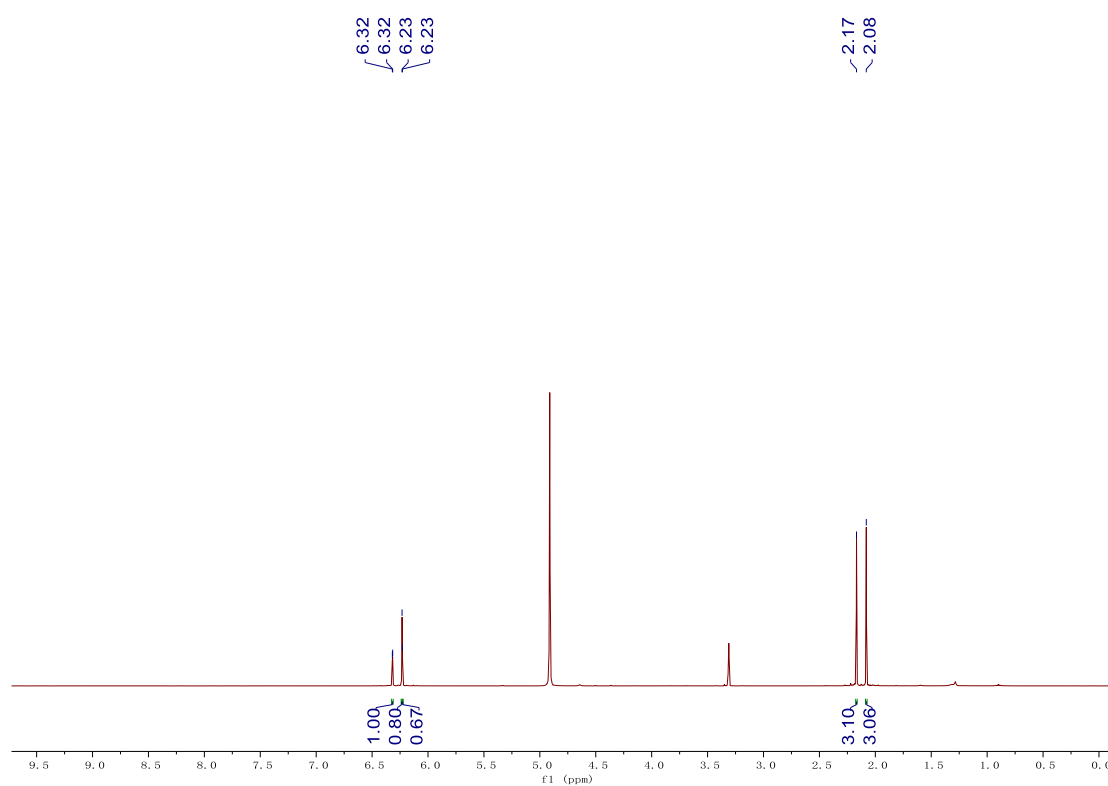

Figure S23.  $^1\text{H}$  NMR spectrum of compound **5** in  $\text{CD}_3\text{OD}$  (600 MHz)

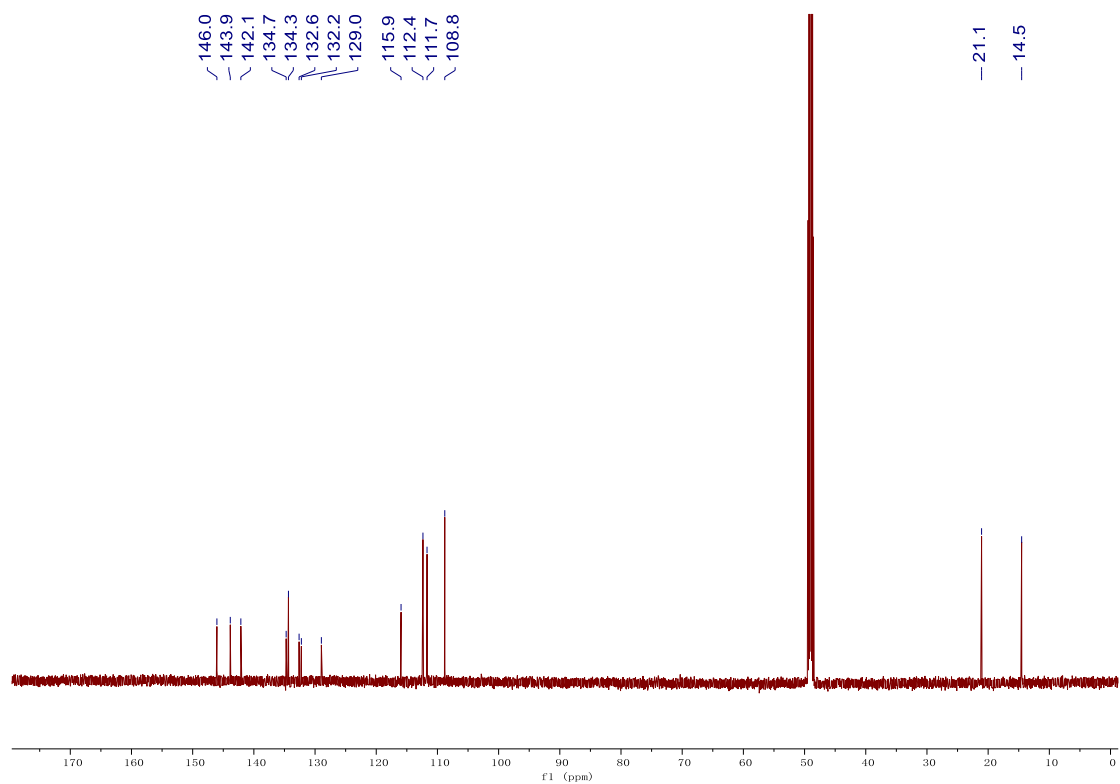

Figure S24. <sup>13</sup>C NMR spectrum of compound 5 in CD<sub>3</sub>OD (600 MHz)

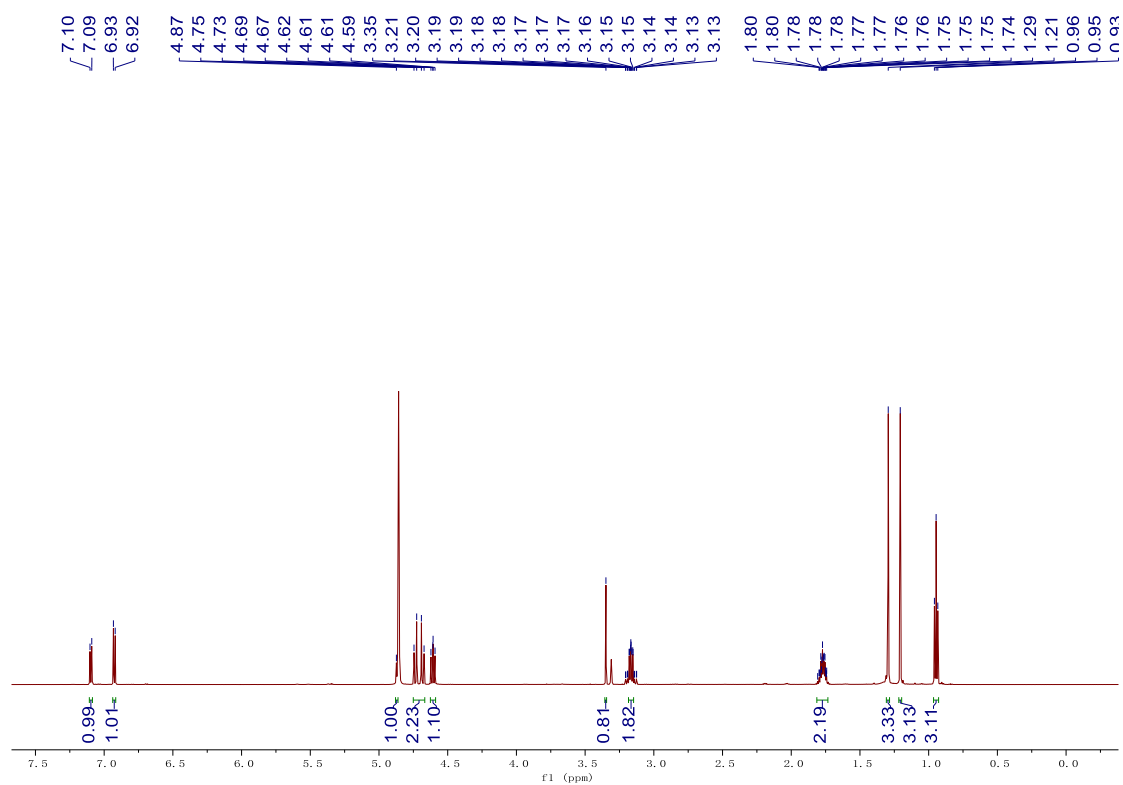

Figure S25. <sup>1</sup>H NMR spectrum of compound 6 in CD<sub>3</sub>OD (600 MHz)

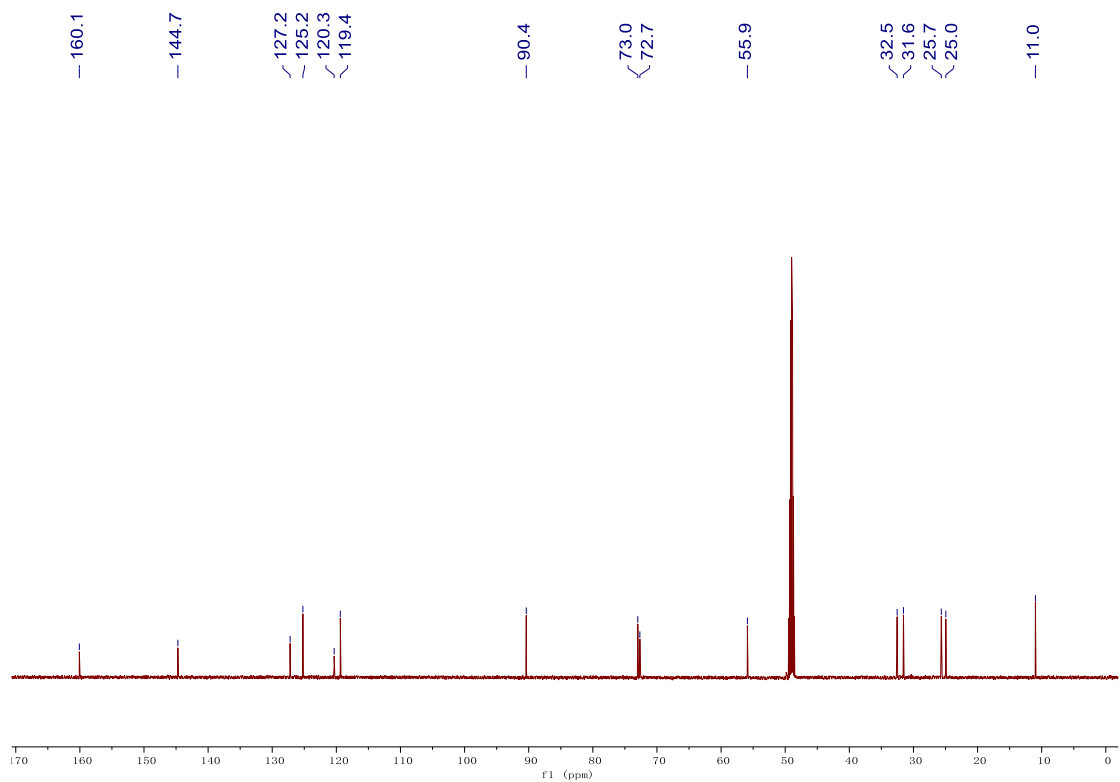

Figure S26. <sup>13</sup>C NMR spectrum of compound **6** in CD<sub>3</sub>OD (600 MHz)

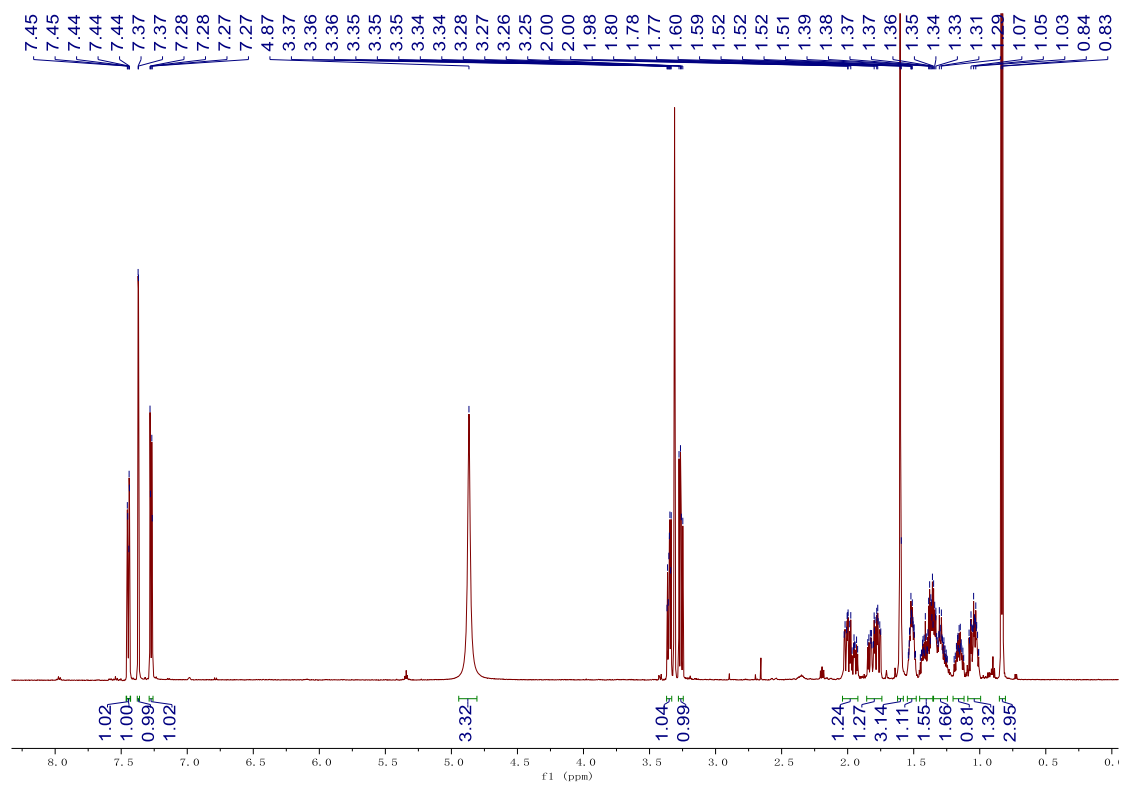

Figure S27. <sup>1</sup>H NMR spectrum of compound **7** in CD<sub>3</sub>OD (600 MHz)

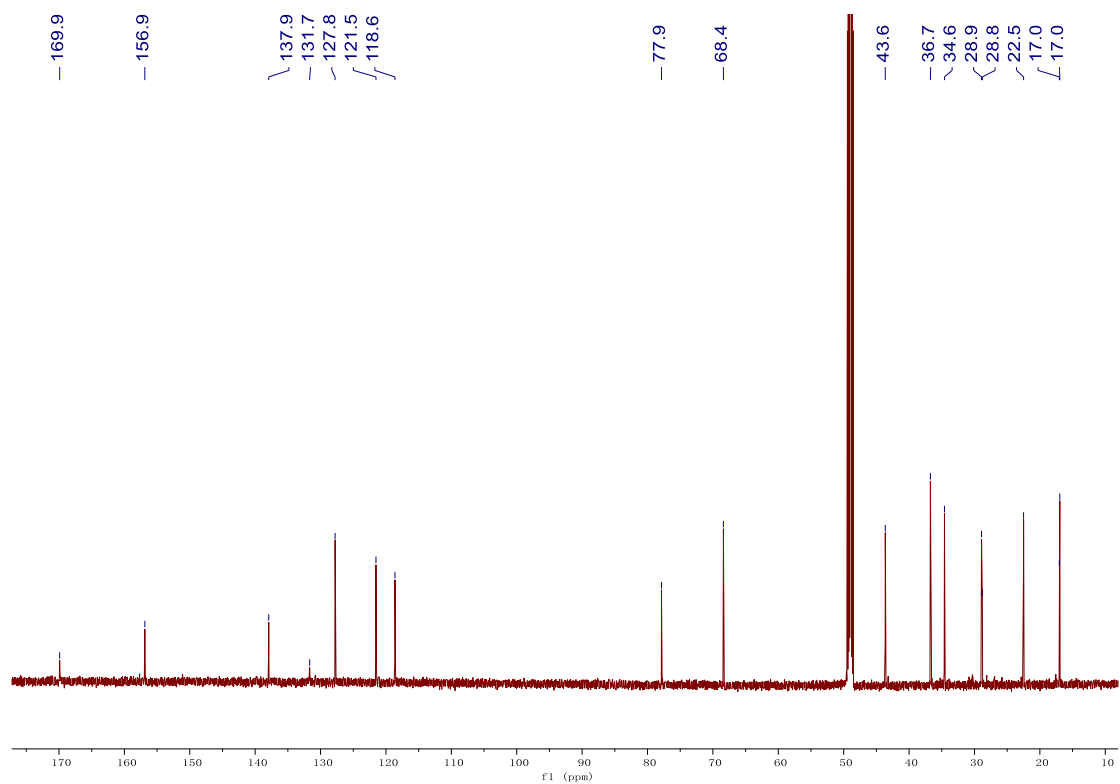

Figure S28.  $^{13}\text{C}$  NMR spectrum of compound **7** in  $\text{CD}_3\text{OD}$  (600 MHz)

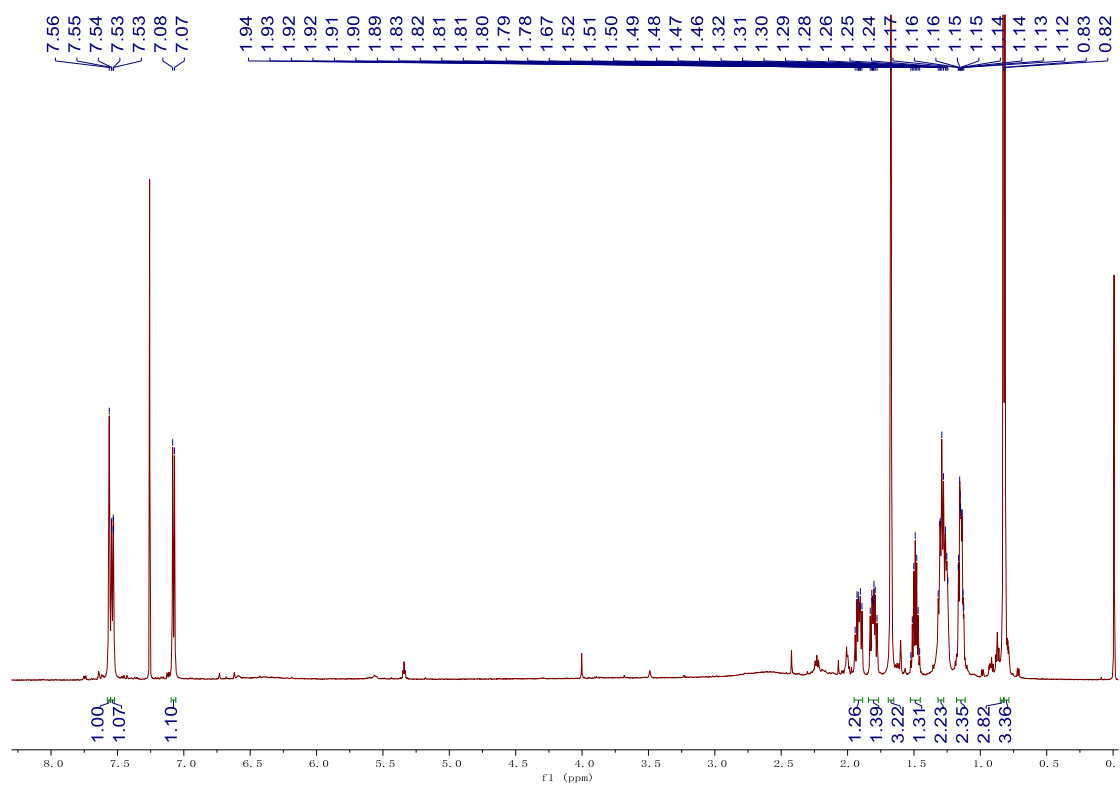

Figure S29.  $^1\text{H}$  NMR spectrum of compound **8** in  $\text{CDCl}_3$  (600 MHz)



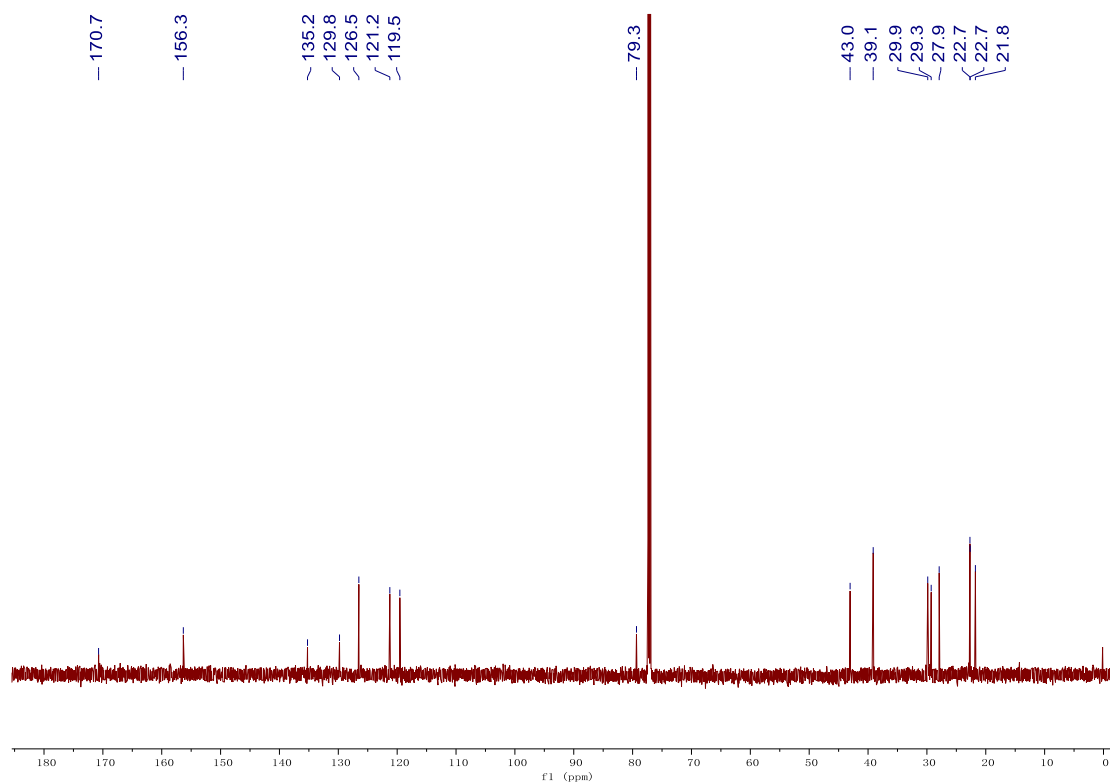

Figure S30.  $^{13}\text{C}$  NMR spectrum of compound **8** in  $\text{CDCl}_3$  (600 MHz)

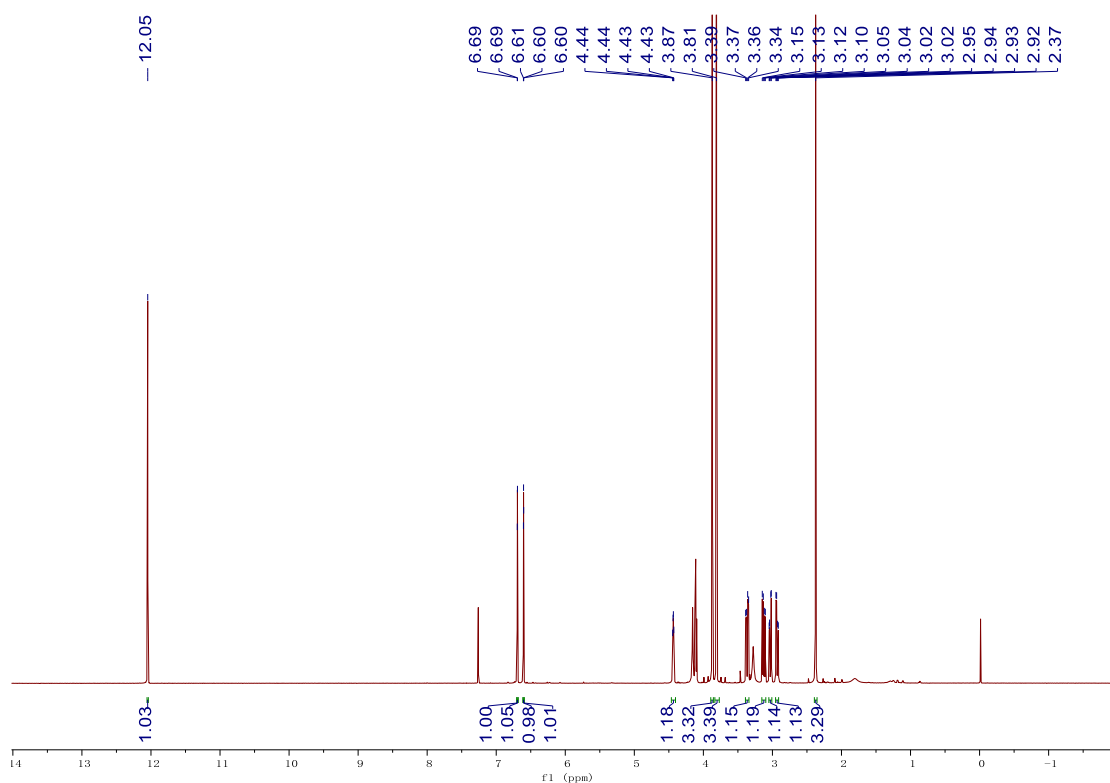

Figure S31.  $^1\text{H}$  NMR spectrum of compound **9** in  $\text{CDCl}_3$  (600 MHz)

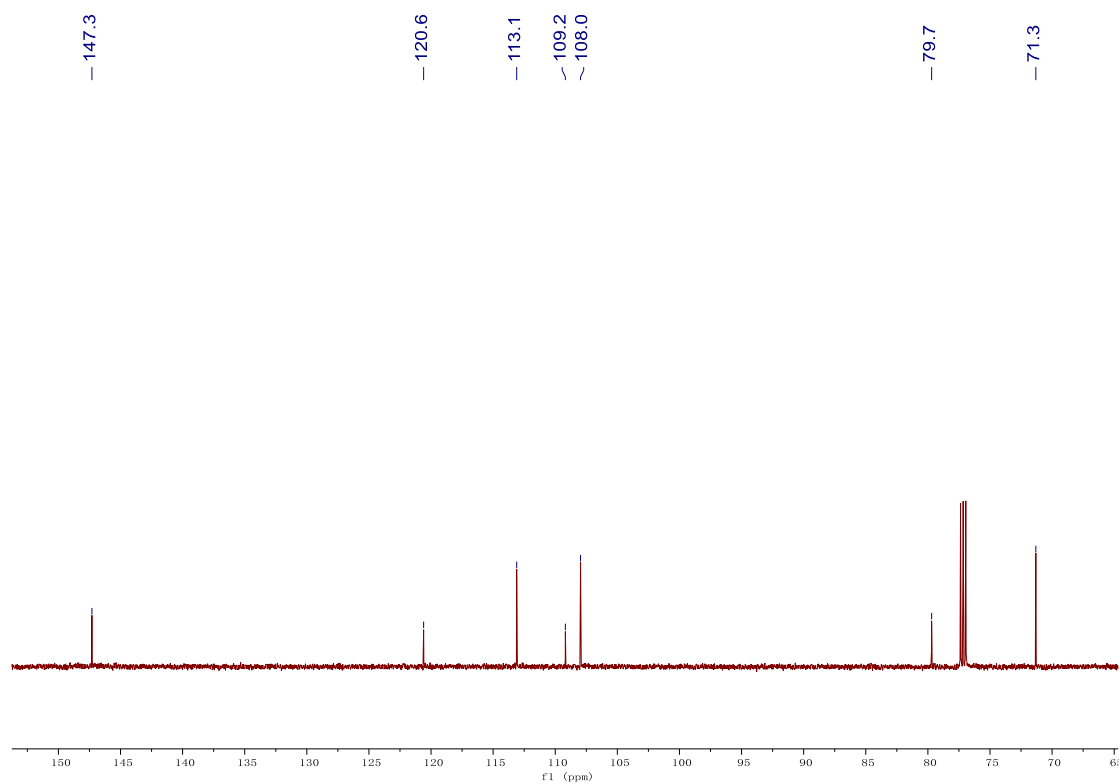

Figure S32.  $^{13}\text{C}$  NMR spectrum of compound **9** in  $\text{CDCl}_3$  (600 MHz)

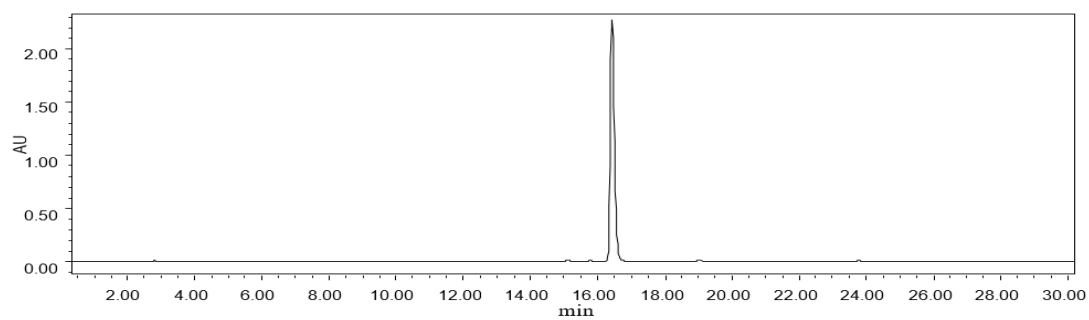

Figure S33. HPLC analysis chromatogram of compound **1**

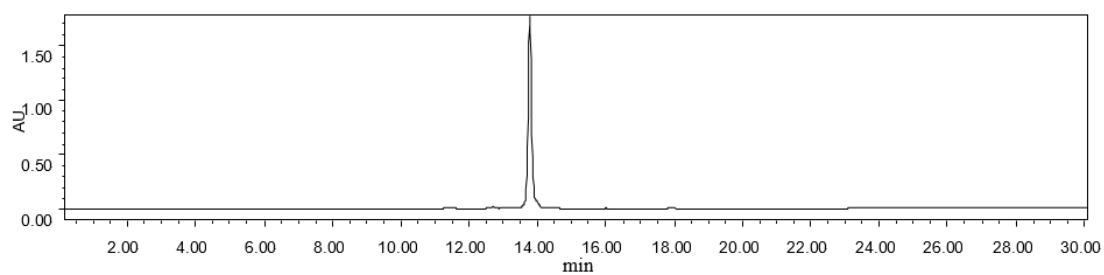

Figure S34. HPLC analysis chromatogram of compound **2**
